# Supplementary material
Source: MDPI journal article supplement (https://www.mdpi.com/2079-6412/8/10/356)
Supplement: s1 [file s1]

## Supplementary Materials

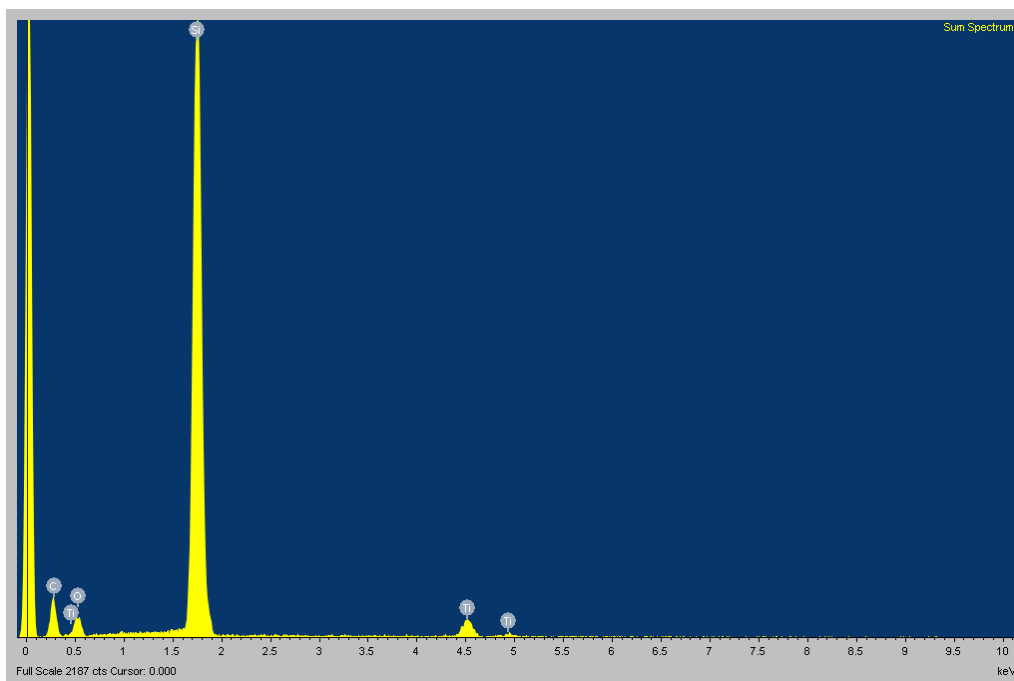

**Figure S1.** EDS spectrum of TiO<sub>2</sub> NRs deposited by spray coating on silicon substrates from the chloroform solution 0.02 M with an application time of 1 min (sample A-ch). The spectrum shows the presence of Ti, C and O. The SEM measurements were performed with an accelerating voltage of 1 kV, a working distance of 3.7 mm and an aperture size of 20  $\mu\text{m}$ .
